# Supplementary material for: Effects of Mao tea from Nankun Mountain on nonalcoholic fatty liver disease in mice
Source: Royal Society of Chemistry journal article supplement (doi:10.1039/d4fo01689k), 2024-01-01
Supplement: d4fo01689k1.pdf [file d4fo01689k1.pdf]

**Title:** Effects of Mao Tea from Nankun Mountain on nonalcoholic fatty liver disease in mice

Authors: Weitao Zhang,<sup>‡a,b</sup> Lianshun Feng,<sup>‡a</sup> Peng Li,<sup>‡d</sup> Aoyi Wang,<sup>d</sup> Chunyan Dai,<sup>e</sup> Yajuan Qi <sup>\*f</sup>, Junfeng Lu<sup>\*g</sup> and Xiaojun Xu<sup>\*b,c</sup>

**Affiliations:**

<sup>a</sup>State Key Laboratory of Natural Medicines, China Pharmaceutical University, 210009, Nanjing, Jiangsu, China.

<sup>b</sup>Oujiang Laboratory (Zhejiang Lab for Regenerative Medicine, Vision, and Brain Health) & School of Pharmaceutical Sciences, Wenzhou Medical University, Wenzhou, Zhejiang 325035, China.

<sup>c</sup>Department of Pharmacy, The Fourth Affiliated Hospital, Zhejiang University School of Medicine, Yiwu, Zhejiang, China; Center for Innovative Traditional Chinese Medicine Target and New Drug Research, International Institutes of Medicine, Zhejiang University, Yiwu, Zhejiang, China.

<sup>d</sup>College of Basic Sciences, Shanxi Agricultural University, Jinzhong, China.

<sup>e</sup>Department of Pathology, The Fourth Affiliated Hospital, Zhejiang University School of Medicine, Yiwu, Zhejiang, China.

<sup>f</sup>School of Basic Medical Sciences, North China University of Science and Technology, Tangshan 063210, China

<sup>g</sup>First Department of Liver Disease, Beijing You'An Hospital, Capital Medical University, Beijing 100069, China.

<sup>‡</sup> These authors share joint first authorship

**Corresponding author:**

Prof. Xiaojun Xu, Zhejiang University, Telephone number: +86-2583271203, E-mail: xiaojunxu2000@163.com.

Prof. Junfeng Lu, Capital Medical University, Telephone number: +86-18201162190, E-mail: junfengdoc@ccmu.edu.cn.

Prof. Yajuan Qi, School of Basic Medical Sciences, North China University of Science and Technology E-mail: yajuanqi@ncst.edu.cn

## Supplementary Tables

Supplementary Table S1. The primer sequences for the targeted genes

| Gene                           | Forward                    | Reverse                    |
|--------------------------------|----------------------------|----------------------------|
| <i>Srebf1</i>                  | GCAGCCACCATCTAGCCTG        | CAGCAGTGAGTCTGCCTTGAT      |
| <i>Fasn</i>                    | GGAGGTGGTGATAGCCGGTAT      | TGGGTAATCCATAGAGCCAG       |
| <i>Acaca</i>                   | CTTCCTGACAAACGAGTCTGG      | CTGCCGAAACATCTCTGGGA       |
| <i>Ppara</i>                   | AGAGCCCCATCTGTCCTCTC       | ACTGGTAGTCTGCAAAACCAA<br>A |
| <i>Il-1<math>\beta</math></i>  | GCAACTGTTCTGAACTCAACT      | ATCTTTTGGGGTCCGTCAACT      |
| <i>Tnf-<math>\alpha</math></i> | GCCTCTTCTCATTCCCTGCTT      | TGGGAACTTCTCATCCCTTTG      |
| <i>Il-6</i>                    | TAGTCCTTCTACCCCAATTTC<br>C | TTGGTCCTTAGCCACTCCTTC      |
| <i>Gapdh</i>                   | CTGGGCTACACTGAGCACC        | AAGTGGTCGTTG AGGGCAATG     |

Supplementary Table S2. HPLC-Q-TOF-MS/MS analysis of MTE

| NO | <i>t</i> R/min | Formula                                                     | Observed<br>m/z | Calculate<br>d m/z | Error<br>(ppm) | MS/MS                                                   | Identification                            | Ref. |
|----|----------------|-------------------------------------------------------------|-----------------|--------------------|----------------|---------------------------------------------------------|-------------------------------------------|------|
| 1  | 3.925          | C <sub>13</sub> H <sub>16</sub> O <sub>10</sub>             | 331.0655        | 331.0665           | -3.10          | 331.0655, 169.0171                                      | 6-O-<br>Galloylglucose                    | 1    |
| 2  | 5.073          | C <sub>14</sub> H <sub>16</sub> O <sub>10</sub>             | 343.0663        | 343.0665           | -0.66          | 343.0663, 191.0598,<br>169.0177                         | Theogallin                                | 2    |
| 3  | 5.239          | C <sub>7</sub> H <sub>6</sub> O <sub>5</sub>                | 169.0119        | 169.0137           | -1.06          | 169.0119, 125.0273, 97.032,                             | Gallic acid                               | 2    |
| 4  | 8.318          | C <sub>7</sub> H <sub>8</sub> N <sub>4</sub> O <sub>2</sub> | 181.073         | 181.0726           | 2.48           | 181.0730, 163.0613,<br>138.0665                         | Theobromine                               | 2    |
| 5  | 8.893          | C <sub>15</sub> H <sub>14</sub> O <sub>7</sub>              | 305.0651        | 305.0661           | -3.38          | 305.0651, 167.0379,<br>165.0228, 137.0271,<br>125.0276, | Gallocatechin                             | 2    |
| 6  | 8.893          | C <sub>15</sub> H <sub>14</sub> O <sub>7</sub>              | 305.0651        | 305.0661           | -3.38          | 305.0651, 167.0379,<br>165.0228, 137.0271,<br>125.0276, | Epigallocatechin<br><br>(Epi)gallocatechi | 2    |
| 7  | 9.39           | C <sub>30</sub> H <sub>26</sub> O <sub>13</sub>             | 593.1301        | 593.1295           | 0.98           | 593.1301, 425.0925                                      | n-(epi)catechin<br>isomer I               | 3    |

|    |        |                                                              |          |          |       |                                                                                                                |                                                    |      |
|----|--------|--------------------------------------------------------------|----------|----------|-------|----------------------------------------------------------------------------------------------------------------|----------------------------------------------------|------|
| 8  | 10.052 | C <sub>30</sub> H <sub>26</sub> O <sub>13</sub>              | 593.1303 | 593.1295 | 1.32  | 593.1303,467.1023,<br>441.0872, 425.0928,<br>407.0822, 289.0757,<br>177.0228, 125.0272,<br>483.0786, 423.0593, | (Epi)catechin-<br>(epi)gallocatechi<br>n isomer I  | 3    |
| 9  | 10.891 | C <sub>20</sub> H <sub>20</sub> O <sub>14</sub>              | 483.0786 | 483.0775 | 2.31  | 271.0498, 241.0403,<br>211.023, 169.0173, 125.0272                                                             | di-galloylglucose<br>isomer I                      | 4    |
| 10 | 11.299 | C <sub>30</sub> H <sub>26</sub> O <sub>13</sub>              | 593.1303 | 593.1295 | 1.32  | 593.1303,467.1023,<br>425.0928, 407.0822,<br>289.0757, 177.0228,<br>125.0272,                                  | (Epi)gallocatechi<br>n-(epi)catechin<br>isomer II  | 3    |
| 11 | 11.564 | C <sub>16</sub> H <sub>18</sub> O <sub>9</sub>               | 353.0874 | 353.0873 | 0.40  | 353.0924, 191.0596,<br>179.0386, 173.0487,<br>161.0266, 135.0481,                                              | Neochlorogenic<br>acid                             | 2    |
| 12 | 14.744 | C <sub>21</sub> H <sub>20</sub> O <sub>14</sub>              | 495.0761 | 495.0775 | -2.80 | 495.0811, 343.0725,<br>191.0581, 169.0181                                                                      | di-GQA                                             | 2    |
| 13 | 15.484 | C <sub>30</sub> H <sub>26</sub> O <sub>13</sub>              | 593.1292 | 593.1295 | -0.54 | 593.1353,467.1023,<br>425.0928, 407.0822,<br>289.0757, 177.0228,<br>125.0272,                                  | (Epi)catechin-<br>(epi)gallocatechi<br>n isomer II | 3    |
| 14 | 16.036 | C <sub>30</sub> H <sub>26</sub> O <sub>12</sub>              | 577.1337 | 577.1346 | -1.57 | 577.1387, 451.1087,<br>407.0819, 289.0763,<br>161.0274, 125.0272                                               | Procyanidin B1                                     | 2    |
| 15 | 16.036 | C <sub>30</sub> H <sub>26</sub> O <sub>12</sub>              | 577.1358 | 577.1346 | 2.07  | 577.1387, 451.1087,<br>407.0819, 289.0763,<br>161.0274, 125.0272                                               | Procyanidin B2                                     | 2    |
| 16 | 16.146 | C <sub>16</sub> H <sub>18</sub> O <sub>8</sub>               | 337.0925 | 337.0923 | 0.46  | 337.0975, 191.0595,<br>163.0439, 119.0531                                                                      | 3-p-CoQA                                           | 5, 6 |
| 17 | 16.555 | C <sub>20</sub> H <sub>20</sub> O <sub>14</sub>              | 483.0786 | 483.0775 | 2.31  | 483.0829, 423.0593,<br>271.0498, 241.0403,<br>211.023, 169.0173, 125.0272                                      | di-galloylglucose<br>isomer II                     | 4    |
| 18 | 17.592 | C <sub>16</sub> H <sub>18</sub> O <sub>9</sub>               | 353.0874 | 353.0873 | 0.40  | 353.0924, 191.0596,<br>179.0386, 173.0487,<br>161.0266, 135.0481,<br>289.0761, 245.0864,                       | Chlorogenic acid                                   | 2    |
| 19 | 17.813 | C <sub>15</sub> H <sub>14</sub> O <sub>6</sub>               | 289.0711 | 289.0712 | -0.40 | 125.0276, 123.048,<br>109.0323, 97.0321                                                                        | Catechin                                           | 2    |
| 20 | 18.052 | C <sub>8</sub> H <sub>10</sub> N <sub>4</sub> O <sub>2</sub> | 195.0878 | 195.0882 | -2.06 | 195.0878, 138.0659,<br>110.0710, 69.0444                                                                       | Caffeine                                           | 2    |
| 21 | 18.332 | C <sub>20</sub> H <sub>20</sub> O <sub>14</sub>              | 483.0786 | 483.0775 | 2.31  | 483.0829, 423.0593,<br>271.0498, 241.0403,<br>211.023, 169.0173, 125.0272                                      | di-galloylglucose<br>isomer III                    | 4    |
| 22 | 19.723 | C <sub>16</sub> H <sub>18</sub> O <sub>9</sub>               | 353.0874 | 353.0873 | 0.40  | 353.0924, 191.0596,<br>179.0386, 173.0487,                                                                     | Cryptochlorogeni<br>c acid                         | 2    |

|    |        |                                                 |          |          |       |                                                                   |                                                                                  |   |
|----|--------|-------------------------------------------------|----------|----------|-------|-------------------------------------------------------------------|----------------------------------------------------------------------------------|---|
|    |        |                                                 |          |          |       | 161.0266, 135.0481,<br>761.1417, 609.1282,                        |                                                                                  |   |
| 23 | 23.267 | C <sub>37</sub> H <sub>30</sub> O <sub>18</sub> | 761.1367 | 761.1354 | 1.71  | 591.1175, 423.076,<br>169.0172, 125.0265                          | Theasinensin B                                                                   | 7 |
| 24 | 25.563 | C <sub>16</sub> H <sub>18</sub> O <sub>8</sub>  | 337.0925 | 337.0923 | 0.46  | 337.0975, 191.0595,<br>163.0439, 119.0531                         | cis-4-p-CoQA                                                                     | 8 |
| 25 | 26.259 | C <sub>15</sub> H <sub>12</sub> O <sub>8</sub>  | 319.0458 | 319.0454 | 1.27  | 319.0508, 191.0390,<br>177.027, 137.0265,<br>125.0275,            | trans-<br>3,3',4',5,5',7-<br>hexahydroxyflav<br>anone                            | 1 |
| 26 | 26.7   | C <sub>15</sub> H <sub>14</sub> O <sub>6</sub>  | 289.0711 | 289.0712 | -0.40 | 289.0761, 245.0864,<br>125.0276, 123.048,<br>109.0323, 97.0321    | Epicatechin                                                                      | 2 |
| 27 | 27.396 | C <sub>16</sub> H <sub>18</sub> O <sub>8</sub>  | 337.0925 | 337.0923 | 0.46  | 337.0975, 191.0595,<br>163.0439, 119.0531                         | trans-4-p-CoQA                                                                   | 8 |
| 28 | 28.169 | C <sub>22</sub> H <sub>18</sub> O <sub>11</sub> | 457.0785 | 457.0771 | 3.08  | 457.0835, 305.0723,<br>170.0213, 161.0287,<br>169.0179, 125.0274  | Epigallocatechin<br>gallate                                                      | 2 |
| 29 | 28.423 | C <sub>27</sub> H <sub>24</sub> O <sub>18</sub> | 635.0901 | 635.0884 | 2.61  | 635.0951, 465.0735,<br>313.0608, 169.0176                         | 1,4,6-tri-O-<br>galloyl-beta-d-<br>glucopyranose                                 | 1 |
| 30 | 33.081 | C <sub>22</sub> H <sub>18</sub> O <sub>11</sub> | 457.0785 | 457.0771 | 3.08  | 457.0835, 305.0723,<br>170.0213, 161.0287,<br>169.0179, 125.0274  | Gallocatechin<br>gallate                                                         | 2 |
| 31 | 35.797 | C <sub>23</sub> H <sub>22</sub> O <sub>13</sub> | 505.0982 | 505.0982 | -0.04 | 505.1032, 353.0921,<br>173.09494, 135.0476                        | 3-C,5-GQA                                                                        | 5 |
| 32 | 36.349 | C <sub>44</sub> H <sub>34</sub> O <sub>21</sub> | 897.1509 | 897.1514 | -0.60 | 897.1559, 727.1405,<br>407.0822, 423.0778,<br>169.0164, 125.0253, | Theasinensin F                                                                   | 1 |
| 33 | 37.575 | C <sub>21</sub> H <sub>20</sub> O <sub>13</sub> | 479.0828 | 479.0826 | 0.48  | 479.0878, 316.0266,<br>271.0297                                   | Myricetin-3'-<br>glucoside                                                       | 1 |
| 34 | 37.685 | C <sub>27</sub> H <sub>30</sub> O <sub>17</sub> | 625.1405 | 625.1405 | 0.03  | 625.1455, 316.0263,<br>271.0293, 178.9861                         | Quercetin O-<br>hex, O-hex                                                       | 2 |
| 35 | 38.657 | C <sub>23</sub> H <sub>22</sub> O <sub>13</sub> | 505.0982 | 505.0982 | -0.04 | 505.1032, 353.0921,<br>173.09494, 135.0476                        | 4-C,5-GQA                                                                        | 5 |
| 36 | 40.843 | C <sub>44</sub> H <sub>34</sub> O <sub>21</sub> | 897.1509 | 897.1514 | -0.60 | 897.1559, 727.1405,<br>407.0822, 423.0778,<br>169.0164, 125.0253, | Epigallocatechin<br>3-O-gallate-<br>(4beta → 6) –<br>epicatechin 3-O-<br>gallate | 1 |
| 37 | 41.229 | C <sub>27</sub> H <sub>30</sub> O <sub>16</sub> | 609.147  | 609.1456 | 2.36  | 609.152, 301.0389,<br>300.0313, 271.0264,<br>255.0348, 151.0072   | Rutin                                                                            | 2 |
| 38 | 41.273 | C <sub>14</sub> H <sub>6</sub> O <sub>8</sub>   | 300.9987 | 300.9984 | 0.85  | 301.0037, 229.9916,                                               | Ellagic acid                                                                     | 2 |

|    |        |                                                 |          |          |       |                                                                   |                                                                                |    |
|----|--------|-------------------------------------------------|----------|----------|-------|-------------------------------------------------------------------|--------------------------------------------------------------------------------|----|
|    |        |                                                 |          |          |       | 117.0374, 145.0328                                                |                                                                                |    |
| 39 | 42.51  | C <sub>22</sub> H <sub>18</sub> O <sub>10</sub> | 441.0832 | 441.0822 | 2.32  | 441.0882, 289.0863,<br>169.0170, 125.0275                         | Epicatechin<br>gallate                                                         | 2  |
| 40 | 42.808 | C <sub>23</sub> H <sub>22</sub> O <sub>12</sub> | 489.1035 | 489.1033 | 0.40  | 489.1085, 337.0976,<br>173.0492, 137.0267                         | G, p-CoQA                                                                      | 2  |
| 41 | 42.973 | C <sub>29</sub> H <sub>22</sub> O <sub>15</sub> | 609.0887 | 609.0881 | 1.07  | 609.0937, 161.0280,<br>125.0276, 169.0178                         | (-)<br>Epigallocatechin-<br>3,5-di-O-gallate                                   | 9  |
| 42 | 43.525 | C <sub>29</sub> H <sub>22</sub> O <sub>15</sub> | 609.0887 | 609.0881 | 1.07  | 609.0937, 161.0280,<br>125.0276, 169.0178                         | Gallocatechin-<br>3,5-di-O-gallate                                             | 9  |
| 43 | 44.221 | C <sub>33</sub> H <sub>40</sub> O <sub>19</sub> | 739.2105 | 739.2086 | 2.62  | 739.2155, 286.0489,<br>285.0457, 284.0373                         | Kaempferol-<br>rhamnosyl-<br>rutinoside                                        | 10 |
| 44 | 45.027 | C <sub>27</sub> H <sub>30</sub> O <sub>15</sub> | 593.1512 | 593.1507 | 0.93  | 593.1562, 285.0457,<br>255.0346                                   | Kaempferol-3-O-<br>rutinoside                                                  | 2  |
| 45 | 45.082 | C <sub>21</sub> H <sub>20</sub> O <sub>11</sub> | 447.0935 | 447.0927 | 1.70  | 447.0985, 284.0372,<br>255.0344, 227.0391                         | Kaempferol-3-O-<br>galactoside                                                 | 11 |
| 46 | 46.65  | C <sub>44</sub> H <sub>34</sub> O <sub>21</sub> | 897.1509 | 897.1514 | -0.60 | 897.1559, 727.1405,<br>407.0822, 423.0778,<br>169.0164, 125.0253, | Epicatechin 3-O-<br>gallate-(4beta-<br>>6)-<br>epigallocatechin<br>3-O-gallate | 1  |
| 47 | 46.826 | C <sub>21</sub> H <sub>20</sub> O <sub>11</sub> | 447.0935 | 447.0927 | 1.70  | 447.0985, 284.0372,<br>255.0344, 227.0391                         | Kaempferol-3-O-<br>glucoside                                                   | 1  |
| 48 | 47.732 | C <sub>24</sub> H <sub>20</sub> O <sub>9</sub>  | 451.1039 | 451.1029 | 2.19  | 451.1089, 287.0576,<br>161.0277                                   | (Epi)gallocatechi<br>n 3-O-p-<br>coumaroate<br>isomer I                        | 12 |
| 49 | 48.118 | C <sub>24</sub> H <sub>20</sub> O <sub>9</sub>  | 451.1039 | 451.1029 | 2.19  | 451.1089, 287.0576,<br>161.0277                                   | (Epi)gallocatechi<br>n 3-O-p-<br>coumaroate<br>isomer II                       | 12 |
| 50 | 50.723 | C <sub>15</sub> H <sub>10</sub> O <sub>8</sub>  | 317.0301 | 317.0297 | 1.12  | 317.0351, 271.0286,<br>151.0066, 137.0235,<br>107.0161            | Myricetin                                                                      | 2  |
| 51 | 50.9   | C <sub>29</sub> H <sub>22</sub> O <sub>14</sub> | 593.0942 | 593.0931 | 1.80  | 593.0992, 423.0788,<br>271.0654, 169.0170,<br>125.0268,           | (-)-Epicatechin<br>3,5-di-O-gallate                                            | 9  |
| 52 | 52.269 | C <sub>24</sub> H <sub>20</sub> O <sub>9</sub>  | 451.1039 | 451.1029 | 2.19  | 451.1089, 287.0576,<br>161.0277                                   | (Epi)catechin 3-<br>O-caffeoate                                                | 12 |
| 53 | 52.501 | C <sub>15</sub> H <sub>10</sub> O <sub>7</sub>  | 301.0344 | 301.0348 | -1.43 | 301.0394, 191.0386,<br>149.0283                                   | Quercetin isomer                                                               | 1  |
| 54 | 52.501 | C <sub>15</sub> H <sub>10</sub> O <sub>7</sub>  | 301.0344 | 301.0348 | -1.43 | 301.0394, 191.0386,<br>149.0283                                   | Quercetin                                                                      | 2  |

|    |        |                                                 |          |          |      |                                                        |                                |          |
|----|--------|-------------------------------------------------|----------|----------|------|--------------------------------------------------------|--------------------------------|----------|
| 55 | 55.349 | C <sub>36</sub> H <sub>28</sub> O <sub>16</sub> | 715.1307 | 715.1299 | 1.10 | 715.1357, 563.129,<br>545.1122, 169.0170,<br>125.0275  | Theaflavin-3-<br>gallate       | 2        |
| 56 | 55.912 | C <sub>27</sub> H <sub>20</sub> O <sub>13</sub> | 551.0828 | 551.0826 | 0.42 | 551.0878, 261.0442,<br>233.0493, 169.0175,<br>125.0276 | Epitheafagallin<br>3-O-gallate | 9,<br>13 |

## Supplementary Figures

### Supplementary Figure S1

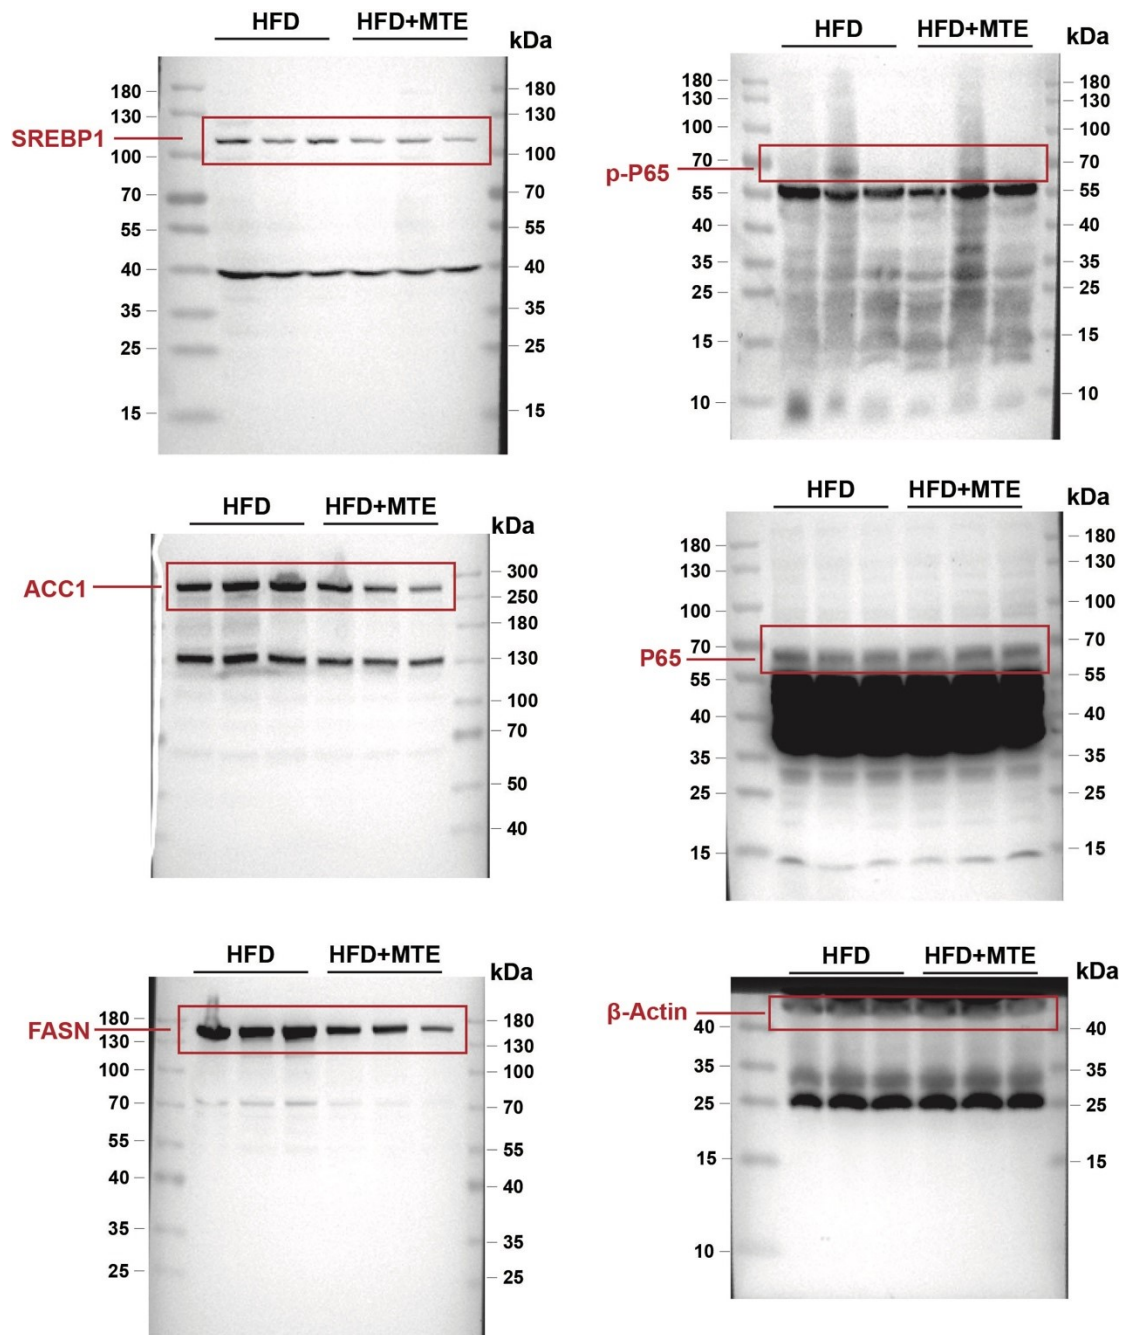

**Fig. S1.** Uncropped images of western blot for all panels shown in Fig. 7E

## References

1. Z. Xin, S. Ma, D. Ren, W. Liu, B. Han, Y. Zhang, J. Xiao, L. Yi and B. Deng, UPLC-Orbitrap-MS/MS combined with chemometrics establishes variations in chemical components in green tea from Yunnan and Hunan origins, *Food Chem*, 2018, **266**, 534-544.
2. J. Zhong, N. Chen, S. Huang, X. Fan, Y. Zhang, D. Ren and L. Yi, Chemical profiling and discrimination of green tea and Pu-erh raw tea based on UPLC-Q-Orbitrap-MS/MS and chemometrics, *Food Chem*, 2020, **326**, 126760.
3. C. Jiménez-Sánchez, J. Lozano-Sánchez, J. A. Gabaldón-Hernández, A. Segura-Carretero and A. Fernández-Gutiérrez, RP-HPLC-ESI-QTOF/MS based strategy for the comprehensive metabolite profiling of (marula) bark, *Ind Crop Prod*, 2015, **71**, 214-234.
4. E. Díaz-de-Cerio, D. Arráez-Román, A. Segura-Carretero, P. Ferranti, R. Nicoletti, G. M. Perrotta and A. M. Gómez-Caravaca, Establishment of pressurized-liquid extraction by response surface methodology approach coupled to HPLC-DAD-TOF-MS for the determination of phenolic compounds of myrtle leaves, *Anal Bioanal Chem*, 2018, **410**, 3547-3557.
5. H. Ouyang, J. M. Li, B. Wu, X. Y. Zhang, Y. Li, S. L. Yang, M. Z. He and Y. L. Feng, A robust platform based on ultra-high performance liquid chromatography quadrupole time of flight tandem mass spectrometry with a two-step data mining strategy in the investigation, classification, and identification of chlorogenic acids in Champ, *J Chromatogr A*, 2017, **1502**, 38-50.
6. D. Ren, L. Ran, C. Yang, M. Xu and L. Yi, Integrated strategy for identifying minor components in complex samples combining mass defect, diagnostic ions and neutral loss information based on ultra-performance liquid chromatography-high resolution mass spectrometry platform: Folium Artemisiae Argyi as a case study, *J Chromatogr A*, 2018, **1550**, 35-44.
7. W. Dai, D. Qi, T. Yang, H. Lv, L. Guo, Y. Zhang, Y. Zhu, Q. Peng, D. Xie, J. Tan and Z. Lin, Nontargeted Analysis Using Ultrapformance Liquid Chromatography-Quadrupole Time-of-Flight Mass Spectrometry Uncovers

- the Effects of Harvest Season on the Metabolites and Taste Quality of Tea (*Camellia sinensis* L.), *J Agric Food Chem*, 2015, **63**, 9869-9878.
8. M. N. Clifford, J. Kirkpatrick, N. Kuhnert, H. Roozendaal and P. R. Salgado, LC-MS analysis of the cis isomers of chlorogenic acids, *Food Chemistry*, 2008, **106**, 379-385.
  9. D. M. Wang, J. L. Lu, A. Q. Miao, Z. Y. Xie and D. P. Yang, HPLC-DAD-ESI-MS/MS analysis in leaves of 22 tea of polyphenols and purine alkaloids cultivars in China, *J Food Compos Anal*, 2008, **21**, 361-369.
  10. I. Tagnaout, H. Zerkani, M. Mahjoubi, M. Bourakhouadar and T. Zair, Phytochemical study, antibacterial and antioxidant activities of extracts of *Capparis spinosa* L, *International Journal of Pharmacognosy and Phytochemical Research*, 2016, **8**, 1993-2005.
  11. H. Kelebek, LC-DAD-ESI-MS/MS characterization of phenolic constituents in Turkish black tea: Effect of infusion time and temperature, *Food Chem*, 2016, **204**, 227-238.
  12. M. Umehara, K. Yanae, H. Maruki-Uchida and M. Sai, Investigation of epigallocatechin-3-O-caffeoate and epigallocatechin-3-O-p-coumaroate in tea leaves by LC/MS-MS analysis, *Food Res Int*, 2017, **102**, 77-83.
  13. X. H. Meng, N. Li, H. T. Zhu, D. Wang, C. R. Yang and Y. J. Zhang, Plant Resources, Chemical Constituents, and Bioactivities of Tea Plants from the Genus *Camellia* Section *Thea*, *J Agric Food Chem*, 2019, **67**, 5318-5349.
